# Supplementary material for: Evaluation of Adverse Pregnancy Outcomes in Physicians Compared With Nonphysicians
Source: PubMed Central journal article supplement (PMC9127555; doi:10.1001/jamanetworkopen.2022.13521), 2022-05-23
Supplement: jamanetwopen-e2213521-s001.pdf [file jamanetwopen-e2213521-s001.pdf]

## Supplementary Online Content

Cusimano MC, Baxter NN, Sutradhar R, et al. Evaluation of adverse pregnancy outcomes in physicians compared with nonphysicians. *JAMA Netw Open*. 2022;5(5):e2213521. doi:10.1001/jamanetworkopen.2022.13521

**eTable 1.** *International Classification of Diseases (ICD)* and Canadian Classification of Intervention (CCI) Codes to Identify Severe Maternal Morbidity (SMM)

**eTable 2.** *International Classification of Diseases (ICD)* and Canadian Classification of Intervention (CCI) Codes to Identify Severe Neonatal Morbidity (SNM)

**eTable 3.** Codes to Identify Specific Covariates and Maternal/Perinatal Complications

**eTable 4.** Multivariable Analyses for Primary Maternal and Perinatal Outcomes

**eTable 5.** Severe Maternal Morbidity and Severe Neonatal Morbidity, Modelled as Count Rather Than Binary Variables

**eTable 6.** Most Frequent Diagnostic and Procedural Indicators for Primary Outcomes Among Physicians and Nonphysicians Experiencing Severe Maternal Morbidity and Severe Neonatal Morbidity, Respectively

**eTable 7.** Baseline Characteristics of Pregnancies in Physicians by Specialty

This supplementary material has been provided by the authors to give readers additional information about their work.

**eTable 1.** *International Classification of Diseases (ICD) and Canadian Classification of Intervention (CCI) codes to identify severe maternal morbidity (SMM).*

| <b>SMM Indicator</b>                                                                                              | <b>ICD or CCI Codes*</b>                                                                                                                                                                                                                                                                                                                                                                                                                                |
|-------------------------------------------------------------------------------------------------------------------|---------------------------------------------------------------------------------------------------------------------------------------------------------------------------------------------------------------------------------------------------------------------------------------------------------------------------------------------------------------------------------------------------------------------------------------------------------|
| Severe preeclampsia and HELLP syndrome                                                                            | O14.1 or O14.2                                                                                                                                                                                                                                                                                                                                                                                                                                          |
| Eclampsia                                                                                                         | O15                                                                                                                                                                                                                                                                                                                                                                                                                                                     |
| Cerebral venous thrombosis in pregnancy, or in the puerperium                                                     | O22.5 or O87.3                                                                                                                                                                                                                                                                                                                                                                                                                                          |
| Acute fatty liver with red blood cell (RBC) transfusion or plasma transfusion                                     | O26.6 + (CIHI BTREDBC = 1 or CIHI BTPLASMA = 1)                                                                                                                                                                                                                                                                                                                                                                                                         |
| Pulmonary, cardiac, and CNS complications of anaesthesia during pregnancy, the puerperium, or labour and delivery | O29.0, O29.1, O29.2, O89.0, O89.1, O89.2, O74.0, O74.1, O74.2 or O74.3                                                                                                                                                                                                                                                                                                                                                                                  |
| Placenta previa with hemorrhage with RBC transfusion                                                              | O44.1 + CIHI BTREDBC = 1                                                                                                                                                                                                                                                                                                                                                                                                                                |
| Placental abruption with coagulation defect                                                                       | O45.0                                                                                                                                                                                                                                                                                                                                                                                                                                                   |
| Antepartum hemorrhage with coagulation defect                                                                     | O46.0                                                                                                                                                                                                                                                                                                                                                                                                                                                   |
| Intrapartum hemorrhage with coagulation defect                                                                    | O67.0                                                                                                                                                                                                                                                                                                                                                                                                                                                   |
| Intrapartum hemorrhage with RBC transfusion                                                                       | O67 + CIHI BTREDBC = 1                                                                                                                                                                                                                                                                                                                                                                                                                                  |
| Rupture of the uterus with RBC transfusion, procedures to the uterus or hysterectomy                              | (O71.0 or O71.1) + any of the following: <ul style="list-style-type: none"> <li>• CIHI BTREDBC = 1, <u>or</u></li> <li>• (1.RM.13, 1.KT.51, 5.PC.91.LA or 5.PC.91.HV) + CIHI BTREDBC = 1, <u>or</u></li> <li>• (5.MD.60.RC, 5.MD.60.RD, 5.MD.60.KE, 5.MD.60.CB or 1.RM.89.LA<sup>a</sup>), <u>or</u></li> <li>• 1.RM.87.LA-GX</li> </ul> <p><sup>a</sup>NOTE: 1.RM.89.LA is included only if codes 1.PL.74, 1.RS.74 or 1.RS.80 are NOT also present</p> |
| Postpartum hemorrhage with RBC transfusion, procedures to the uterus or hysterectomy                              | O72 + any of the following: <ul style="list-style-type: none"> <li>• BTREDBC = 1, <u>or</u></li> <li>• (1.RM.13, 1.KT.51, 5.PC.91.LA or 5.PC.91.HV) + BTREDBC = 1, <u>or</u></li> <li>• (5.MD.60.RC, 5.MD.60.RD, 5.MD.60.KE, 5.MD.60.CB or 1.RM.89.LA<sup>b</sup>), <u>or</u></li> <li>• 1.RM.87.LA-GX</li> </ul> <p><sup>b</sup>NOTE: 1.RM.89.LA is included only if codes 1.PL.74, 1.RS.74 or 1.RS.80 are NOT also present</p>                        |
| Cardiac conditions                                                                                                | O74.2, O89.1, O90.3, I21, I22, I42, I43, I46, I49.0, I50, J81, 1.HZ.09 or 1.HZ.30                                                                                                                                                                                                                                                                                                                                                                       |
| Obstetric shock                                                                                                   | O75.1, R57, T80.5 or T88.6                                                                                                                                                                                                                                                                                                                                                                                                                              |
| Septicemia during labour                                                                                          | O75.3                                                                                                                                                                                                                                                                                                                                                                                                                                                   |
| Complications of obstetric surgery and procedures                                                                 | O75.4                                                                                                                                                                                                                                                                                                                                                                                                                                                   |
| Puerperal sepsis                                                                                                  | O85                                                                                                                                                                                                                                                                                                                                                                                                                                                     |
| Obstetric embolism                                                                                                | O88                                                                                                                                                                                                                                                                                                                                                                                                                                                     |
| Acute renal failure                                                                                               | O90.4, N17, N19 or N99.0                                                                                                                                                                                                                                                                                                                                                                                                                                |
| Death, obstetric, cause unspecified                                                                               | O95                                                                                                                                                                                                                                                                                                                                                                                                                                                     |
| Death, obstetric, after 42 days but 1 year after delivery                                                         | O96                                                                                                                                                                                                                                                                                                                                                                                                                                                     |
| Death from sequelae of direct obstetric causes                                                                    | O97                                                                                                                                                                                                                                                                                                                                                                                                                                                     |
| Disseminated intravascular coagulation                                                                            | D65                                                                                                                                                                                                                                                                                                                                                                                                                                                     |
| Sickle cell anemia with crisis                                                                                    | D57.0                                                                                                                                                                                                                                                                                                                                                                                                                                                   |
| Acute psychosis                                                                                                   | F53.1 or F23                                                                                                                                                                                                                                                                                                                                                                                                                                            |

|                                                                                                 |                                                                                                                                        |
|-------------------------------------------------------------------------------------------------|----------------------------------------------------------------------------------------------------------------------------------------|
| Status epilepticus                                                                              | G41                                                                                                                                    |
| Cerebral edema or coma                                                                          | G93.6 or R40.2                                                                                                                         |
| Cerebrovascular diseases: subarachnoid and intracranial hemorrhage, cerebral infarction, stroke | I60, I61, I62, I63 or I64                                                                                                              |
| Status asthmaticus                                                                              | J45.01, J45.11, J45.81 or J45.91                                                                                                       |
| Adult respiratory distress syndrome                                                             | J80                                                                                                                                    |
| Acute abdomen                                                                                   | K35, K37, K65, N73.3 or N73.5                                                                                                          |
| Hepatic failure                                                                                 | K71 or K72                                                                                                                             |
| Sudden death, death from unspecified cause                                                      | R96, R97, R98 or R99                                                                                                                   |
| Assisted ventilation through endotracheal tube                                                  | 1.GZ.31.CA-ND                                                                                                                          |
| Assisted ventilation through tracheostomy                                                       | 1.GZ.31.CR-ND                                                                                                                          |
| Hysterectomy                                                                                    | 5.MD.60.RC, 5.MD.60.RD, 5.MD.60.KE, 5.MD.60.CB, 1.RM.89.LA (exclude if 1.PL.74, 1.RS.74 or 1.RS.80 code also present) or 1.RM.87.LA-GX |
| Dialysis                                                                                        | 1.PZ.21                                                                                                                                |
| Evacuation of incisional hematoma with RBC transfusion                                          | 5.PC.73.JS + CIHI BTREDBC = 1                                                                                                          |
| Repair of bladder, urethra, or intestine                                                        | 5.PC.80.JR, 1.NK.80 or 1.NM.80                                                                                                         |
| Procedures to the uterus/pelvic vessels with RBC transfusion                                    | (1.RM.13, 1.KT.51, 5.PC.91.LA or 5.PC.91.HV) + CIHI BTREDBC = 1                                                                        |
| Surgical or manual correction of inverted uterus for vaginal births only                        | 5.PC.91.HQ or 5.PC.91.HP, restricted to vaginal births (i.e., absence of caesarean 5.MD.60)                                            |
| Reclosure of caesarean wound                                                                    | (5.PC.80.JM or 5.PC.80.JH) + CIHI BTREDBC = 1                                                                                          |
| Curettage with RBC transfusion                                                                  | (5.PC.91.GA, 5.PC.91.GC or 5.PC.91.GD) + CIHI BTREDBC = 1                                                                              |
| Maternal ICU admission                                                                          | SCU in ('10','20','25','30','35','40','45','60','80')                                                                                  |

Notes on Selected Diagnostic and Procedure Codes:

(1) Coding specific to severe preeclampsia and HELLP (O14.1 and O14.2) began in 2012.

(2) Codes under acute fatty liver (O26.6) were expanded in ICD-10-CA version 2009 to: (a) Add codes for the sixth digits of 2 (“Delivered, with mention of postpartum complication”) and 4 (“Postpartum condition or complication”), which would have previously been captured at O90.802 and O90.804 for “Other complications of the puerperium, not elsewhere classified”, respectively; and (b) Include “Cholestasis (intrahepatic) in pregnancy” and “Obstetric cholestasis,” which would previously have been classified under O99.6 for “Diseases of the digestive system complicating pregnancy, childbirth and the puerperium” which included conditions in K80-K93 and more specifically K83.1 for “Cholestasis not elsewhere classified”.

(3) CCI code 5.PC.91.HV for “Interventions to uterus (following delivery or abortion), compression using intrauterine balloon” was introduced in CCI version 2012. This intervention would previously have been captured at 5.PC.91.HT for “Interventions to uterus (following delivery or abortion) uterine (and vaginal) packing.”

**eTable 2.** International Classification of Diseases (ICD) and Canadian Classification of Intervention (CCI) codes to identify severe neonatal morbidity (SNM).

| SNM Indicator                                                                                                | ICD or CCI Codes                                                                                                                                                                                                                                                                                                                                                                                        |
|--------------------------------------------------------------------------------------------------------------|---------------------------------------------------------------------------------------------------------------------------------------------------------------------------------------------------------------------------------------------------------------------------------------------------------------------------------------------------------------------------------------------------------|
| <b>Diagnoses</b>                                                                                             |                                                                                                                                                                                                                                                                                                                                                                                                         |
| Gestational age <32 weeks                                                                                    | (from MOMBABY)                                                                                                                                                                                                                                                                                                                                                                                          |
| Birth weight <1500 grams                                                                                     | (from MOMBABY)                                                                                                                                                                                                                                                                                                                                                                                          |
| Neonatal death (within 28 days of birth or before a discharge home from hospital)                            | (from RPDB: [DTHDATE] within 28 days of index date)                                                                                                                                                                                                                                                                                                                                                     |
| Respiratory distress syndrome                                                                                | P220                                                                                                                                                                                                                                                                                                                                                                                                    |
| Seizure                                                                                                      | P90, R56                                                                                                                                                                                                                                                                                                                                                                                                |
| Intraventricular hemorrhage (grades 2,3,4)                                                                   | P521, P522                                                                                                                                                                                                                                                                                                                                                                                              |
| Cerebral infarction                                                                                          | I63                                                                                                                                                                                                                                                                                                                                                                                                     |
| Periventricular leukomalacia                                                                                 | P912                                                                                                                                                                                                                                                                                                                                                                                                    |
| Birth trauma (intracranial hemorrhage, paralysis due to brachial plexus injury, skull or long bone fracture) | P100 to P103, P130, P132, P133, P140, P141                                                                                                                                                                                                                                                                                                                                                              |
| Hypoxic ischemic encephalopathy                                                                              | P915, P9181, P916                                                                                                                                                                                                                                                                                                                                                                                       |
| Necrotising enterocolitis                                                                                    | P77                                                                                                                                                                                                                                                                                                                                                                                                     |
| Broncho-pulmonary dysplasia                                                                                  | P271                                                                                                                                                                                                                                                                                                                                                                                                    |
| Sepsis/septicaemia (streptococcus, staphylococcus, <i>E.coli</i> , unspecified Gram-negative)                | P36 (preferred code by the Public Health Agency of Canada used)                                                                                                                                                                                                                                                                                                                                         |
| Pneumonia                                                                                                    | P23 (preferred code by the Public Health Agency of Canada used)                                                                                                                                                                                                                                                                                                                                         |
| Other respiratory: primary atelectasis, respiratory failure                                                  | P280, P285                                                                                                                                                                                                                                                                                                                                                                                              |
| <b>Procedures</b>                                                                                            |                                                                                                                                                                                                                                                                                                                                                                                                         |
| Resuscitation                                                                                                | 1HZ30JN, 1HZ30JY, 1GZ30CJ, 1GZ30CJNB, 1GZ30JH                                                                                                                                                                                                                                                                                                                                                           |
| Ventilatory support (mechanical ventilation and/or CPAP)                                                     | 1GZ31CAEP, 1GZ31CAND, 1GZ31CAPK, 1GZ31CBND, 1GZ31CRND, 1GZ31GPND, 1GZ31JAGX, 1GZ31JAMD, 1GZ31JANC, 1GZ31JAPK                                                                                                                                                                                                                                                                                            |
| Central venous or arterial catheter                                                                          | 1KV53HACH, 1KV53HAFT, 1KV53LAFT, 2IM28GP, 2LZ28GQPL, 2LZ28GRPL, 2LZ28JAPL, 1KX53HACH, 1KX53HAFT, 1KX53 LAFT, 2LZ28GQPL, 2LZ28GRPL                                                                                                                                                                                                                                                                       |
| Pneumothorax requiring intercostal catheter                                                                  | 1GV52DA, 1GV52DATS, 1GV52HA, 1GV52HAHE, 1GV52HATK, 1GV52LA, 1GV52LATS, 1GV52LAXXE, 1GV54JATS, 1GV55JATS                                                                                                                                                                                                                                                                                                 |
| Any intravenous fluids                                                                                       | 1LZ35CAE6, 1LZ35HAC1, 1LZ35HAC5, 1LZ35HAC6, 1LZ35HAC7, 1LZ35HAE6, 1LZ35HAT7, 1LZ35HAT9, 1LZ35HAZ9, 1LZ35HHC1, 1LZ35HHC5, 1LZ35HHC6, 1LZ35HHC7, 1LZ35HHE0, 1LZ35HHE6, 1LZ35HHT7, 1LZ35HHT9, 1LZ35HHZ9, 1LZ35HRC5, 1LZ35HRC6, 1LZ35HRC7, 1LZ35HRT9, 1LZ35HRZ9                                                                                                                                             |
| Transfusion of blood or blood products                                                                       | 1LZ19HHU1A, 1LZ19HHU1J, 1LZ19HHU2A, 1LZ19HHU2J, 1LZ19HHU3J, 1LZ19HHU4J, 1LZ19HHU5J, 1LZ19HHU6A, 1LZ19HHU6J, 1LZ19HHU9A, 1LZ19HHU9J, 1LZ19HMU1, 1LZ19HMU2, 1LZ19HMU9, 1LZ35HAC5                                                                                                                                                                                                                          |
| Any body cavity surgical procedure (substring)                                                               | 1AA52, 1AA87, 1AC87, 1AE87, 1AF87, 1AG87, 1AJ87, 1AK87, 1AN52, 1AN59, 1AN87, 1AP59, 1AP72, 1AP87, 1AW59, 1AW72, 1AW87, 1AX87, 1BA72, 1BA80, 1BA87, 1BB72, 1BB80, 1BB87, 1BD72, 1BD80, 1BD87, 1BF80, 1BG72, 1BG80, 1BG87, 1BK59, 1BM72, 1BM80, 1BM87, 1BN72, 1BN80, 1BN87, 1BP72, 1BP80, 1BP87, 1BQ72, 1BQ80, 1BQ87, 1BS72, 1BS80, 1BS87, 1BT72, 1BT80, 1BT87, 1GA87, 1GA89, 1GB87, 1GB89, 1GD89, 1GE80, |

1GE87, 1GE89, 1GE91, 1GH84, 1GJ86, 1GJ87, 1GK87, 1GK89, 1GM80, 1GM86, 1GM87, 1GN92, 1GR87, 1GR89, 1GR91, 1GT78, 1GT87, 1GT89, 1GT91, 1GV87, 1GV89, 1GW87, 1GX80, 1GX86, 1GX87, 1GY70, 1GY72, 1GY86, 1HJ76, 1HJ82, 1HN87, 1HP76, 1HP78, 1HP80, 1HP82, 1HP83, 1HP87, 1HR80, 1HR84, 1HR87, 1HS80 (excl. 1HS80G), 1HS90, 1HT80 (excl. 1HT80G), 1HT89, 1HT90, 1HU80 (excl. 1HU80G), 1HU90, 1HV80 (excl. 1HV80G), 1HV90, 1HW78, 1HW79, 1HX80, 1HX87, 1HX80, 1HZ87, 1IA76, 1IA80, 1IA87, 1IB76, 1IB79, 1IB80, 1IB82, 1IB87, 1IC76, 1IC80, 1IC82, 1IC87, 1ID76, 1ID80, 1ID82, 1ID86, 1ID87, 1IF83, 1IJ76, 1IJ80, 1IM76, 1IM80, 1IM82, 1IM83, 1IM87, 1IN83, 1IN84, 1IN87, 1JE57 (excl. 1JE57G), 1JE76, 1JE80, 1JE87, 1JJ76, 1JJ80, 1JK76, 1JK80, 1JK87, 1JW51 (excl. 1JW51G), 1JW57, 1JW76, 1LA84, 1LC84, 1LD84, 1NA72, 1NA74, 1NA76, 1NA77, 1NA80, 1NA84, 1NA86, 1NA87, 1NA88, 1NA89, 1NA90, 1NA91, 1NA92, 1NE80, 1NF76, 1NF78, 1NF80, 1NF82, 1NF84, 1NF86, 1NF87 (excl. 1NF87B), 1NF89, 1NF90, 1NF91, 1NF92, 1NK76, 1NK77, 1NK80, 1NK82, 1NK84, 1NK87 (excl. 1NK87B), 1NM74, 1NM76, 1NM77, 1NM80, 1NM82, 1NM87 (excl. 1NM87B), 1NM89, 1NM91, 1NP72, 1NP73, 1NP86, 1NQ74 (excl. 1NQ74B), 1NQ80, 1NQ84, 1NQ86, 1NQ87 (excl. 1NQ87B), 1NQ89, 1NQ90, 1NT80, 1NT84, 1NT86, 1NT87, 1NV89, 1OA87, 1OB87, 1OB89, 1OD76, 1OD89, 1OE76, 1OE80, 1OE89, 1OJ76 (excl. 1OJ76B), 1OJ87, 1OJ89, 1OK87, 1OK89, 1OK91, 1OT72, 1OT87, 1OT91, 1PB87, 1PB89, 1PC80, 1PC87 (excl. 1PC87D), 1PC89, 1PC91, 1PE57 (excl. 1PE57BD), 1PE80 (excl. 1PE80D), 1PE82, 1PE87 (excl. 1PE87D), 1PE89 (excl. 1PE89D), 1PG76, 1PG77, 1PG80 (excl. 1PG80D), 1PG86, 1PG89, 1PL74 (excl. 1PL74CD), 1PL80, 1PM79, 1PM86, 1PM87 (excl. 1PM87B), 1PM89, 1PM90, 1PM91, 1PM92, 1QE53, 1QE80, 1QE82, 1QE84, 1QE87, 1QE89, 1QG89, 1QM74, 1QM80, 1QM87, 1QM89, 1QM91, 1QN82, 1QT87, 1QT91, 1RB74, 1RB80, 1RB83, 1RB87, 1RB89, 1RD89, 1RF51, 1RF72, 1RF74, 1RF80, 1RF87, 1RF89, 1RM87 (excl. 1RM87B), 1RM89, 1RM91, 1RN87, 1RN89, 1RS74, 1RS80, 1RS86, 1RS87, 1RS89, 1RW87, 1RW88, 1RW91, 1RW92, 1SA74, 1SA75, 1SA80, 1SA89, 1SC74, 1SC75, 1SC80, 1SC87, 1SC89, 1SE53, 1SE89 (excl. 1SE89D), 1SF80, 1SF87, 1SF89, 1SG80, 1SG87, 1SH87, 1SM74, 1SM80, 1SM87, 1SN87, 1SN93, 1SQ53, 1SQ74, 1SQ80, 1SQ87, 1SQ91, 1SQ93, 1SW74, 1SY80, 1SY84, 1SY87, 1SZ87, 1VA53, 1VA74, 1VA75, 1VA80, 1VA87, 1VA93, 1VC74, 1VC80, 1VC87, 1VC91, 1VC93, 1VE80, 1VG53, 1VG55, 1VG72, 1VG73, 1VG74, 1VG75, 1VG80, 1VG87, 1VG93, 1VK80, 1VK87, 1VK89, 1VL80, 1VL87, 1VM80, 1VM87, 1VN80, 1VN87, 1VP74, 1VP80, 1VP87, 1VP89, 1VQ74, 1VQ79, 1VQ80, 1VQ82, 1VQ87, 1VQ91, 1VQ93, 1VS72, 1VS80, 1VX87

**eTable 3.** Codes to identify specific covariates and maternal/perinatal complications.

| <b>Disease/Condition</b>       | <b>Citation</b>                                                                                                                                                                      | <b>Source/Codes</b>                                                                                                                                          |
|--------------------------------|--------------------------------------------------------------------------------------------------------------------------------------------------------------------------------------|--------------------------------------------------------------------------------------------------------------------------------------------------------------|
| <b>Covariates</b>              |                                                                                                                                                                                      |                                                                                                                                                              |
| Hypertension                   | Tu et al. Prevalence and incidence of hypertension from 1995 to 2005: a population-based study. <i>CMAJ</i> . 2008; 178(11): 1429-1435.<br><br>SN: 72% / SP: 95%                     | <b>Ontario Hypertension Database</b><br>ICD-9: 401, 402, 403, 404, 405<br>ICD-10: I10, I11, I12, I13, I15<br>OHIP: 401, 402, 403, 404, 405                   |
| Diabetes                       | Lipscombe et al. Identifying diabetes cases from administrative data: a population-based validation study. <i>BMC Health Serv Res</i> . 2018;18(1):316.<br><br>SN: 90.0% / SP: 97.7% | <b>Ontario Diabetes Database</b><br>ICD-9: 250<br>ICD-10: E10, E11, E13, E14<br>OHIP: 250, K030, K045, K046, Q040<br>SUBCLNAM = Insulins; oral antiglycemics |
| <b>Outcomes</b>                |                                                                                                                                                                                      |                                                                                                                                                              |
| Preterm birth (23-36 weeks GA) | Ray et al. Mortality in infants affected by preterm birth and severe small-for-gestational age birth weight. <i>Pediatrics</i> . 2017; 140(6):e20171881.                             | <b>ICES MOMBABY</b><br>23 <= B_GESTWKS_DEL <= 36<br>(if missing use M_GESTWKS_DEL)                                                                           |
| Small-for-gestational age      | Ray et al. Mortality in infants affected by preterm birth and severe small-for-gestational age birth weight. <i>Pediatrics</i> . 2017; 140(6):e20171881.                             | <b>ICES MOMBABY</b><br>B_WEIGHT <10th percentile for B_SEX and B_GESTWKS_DEL (if missing use M_GESTWKS_DEL)                                                  |
| Gestational hypertension       | Garg AX. Gestational hypertension and pre-eclampsia in living kidney donors. <i>N Engl J Med</i> . 2015; 372(2): 124-133.                                                            | <b>CIHI-DAD</b><br>ICD9: 642.0, 642.3, 642.9<br>ICD10: O13, O16                                                                                              |
| Pre-eclampsia or eclampsia     | Garg AX. Gestational hypertension and pre-eclampsia in living kidney donors. <i>N Engl J Med</i> . 2015; 372(2): 124-133.                                                            | <b>CIHI-DAD</b><br>ICD9: 642.4, 642.5, 642.6, 642.7<br>ICD10: O11, O14, O15<br><b>OHIP:</b> 642                                                              |
| Spontaneous vaginal delivery   | KS Joseph et al. Validation of perinatal data in the Discharge Abstract Database of the Canadian Institute for Health Information. <i>Chronic Dis Can</i> . 2009; 29(3):96-100.      | <b>CIHI-DAD</b><br>CCP: 85.6, 85.69<br>CCI: 5.MD.50.^, 5.MD.51.^, 5.MD.52.^<br><b>OHIP:</b> P006                                                             |
| Operative vaginal delivery     | KS Joseph et al. Validation of perinatal data in the Discharge Abstract Database of the Canadian Institute for Health Information. <i>Chronic Dis Can</i> . 2009; 29(3):96-100.      | <b>CIHI-DAD</b><br>CCP: 84.0-4; 84.7-9<br>CCI: 5.MD.53.^, 5.MD.54.^, 5.MD.55.^<br><b>OHIP:</b> P020                                                          |
| Caesarean section              | KS Joseph et al. Validation of perinatal data in the Discharge Abstract Database of the Canadian Institute for Health Information. <i>Chronic Dis Can</i> . 2009; 29(3):96-100.      | <b>CIHI-DAD</b><br>CCP: 860, 861, 862, 868, 869<br>CCI: 5.MD.60<br><b>OHIP:</b> P018, P041, P042                                                             |

Abbreviations: Canadian Institute for Health Information Discharge Abstract Database (DAD); Gestational age (GA); International Classification of Diseases (ICD); Ontario Health Insurance Plan Database (OHIP); sensitivity (SN); specificity (SP)

**eTable 4.** Multivariable analyses for primary maternal and perinatal outcomes.

| Covariate                                  | Severe Maternal Morbidity |         | Severe Neonatal Morbidity |         |
|--------------------------------------------|---------------------------|---------|---------------------------|---------|
|                                            | OR (95% CI)               | p-value | OR (95% CI)               | p-value |
| <b>Physician occupation</b>                |                           |         |                           |         |
| Yes                                        | 1.13 (0.97-1.32)          | 0.10    | 0.79 (0.72-0.87)          | <0.001  |
| No                                         | Ref                       | –       | Ref                       | –       |
| <b>Age</b>                                 |                           |         |                           |         |
| Per year increase                          | 1.03 (1.02-1.04)          | <0.001  | 1.00 (1.00-1.01)          | 0.24    |
| <b>Year of birth</b>                       |                           |         |                           |         |
| Per year increase                          | 1.04 (1.03-1.04)          | <0.001  | 1.03 (1.02-1.03)          | <0.001  |
| <b>Immigration status</b>                  |                           |         |                           |         |
| Canadian-born                              | Ref                       | –       | Ref                       | –       |
| Recent immigrant                           | 0.99 (0.92-1.07)          | 0.76    | 0.87 (0.84-0.91)          | <0.001  |
| <b>Comorbidities</b>                       |                           |         |                           |         |
| 0-5                                        | Ref                       | –       | Ref                       | –       |
| 6-9                                        | 1.33 (1.24-1.42)          | <0.001  | 1.16 (1.12-1.21)          | <0.001  |
| 10+                                        | 1.79 (1.65-1.94)          | <0.001  | 1.45 (1.38-1.52)          | <0.001  |
| <b>Parity and history of preterm birth</b> |                           |         |                           |         |
| No prior                                   | Ref                       | –       | Ref                       | –       |
| 1 prior term                               | 0.61 (0.57-0.65)          | <0.001  | 0.59 (0.57-0.61)          | <0.001  |
| 1 prior preterm                            | 0.97 (0.81-1.15)          | 0.72    | 1.58 (1.45-1.72)          | <0.001  |
| 2+ prior, all term                         | 0.64 (0.58-0.70)          | <0.001  | 0.59 (0.56-0.63)          | <0.001  |
| 2+ prior, 1+ preterm                       | 0.90 (0.73-1.10)          | 0.29    | 1.27 (1.14-1.42)          | <0.001  |
| <b>Multiple status</b>                     |                           |         |                           |         |
| Singleton                                  | Ref                       | –       | Ref                       | –       |
| Twins or higher order                      | 2.39 (2.14-2.67)          | <0.001  | 4.76 (4.50-5.04)          | <0.001  |
| <b>Mode of delivery</b>                    |                           |         |                           |         |
| Spontaneous vaginal                        | Ref                       | –       | Ref                       | –       |
| Operative vaginal                          | 1.40 (1.26-1.56)          | <0.001  | 1.38 (1.31-1.46)          | <0.001  |
| Caesarean section                          | 2.73 (2.56-2.91)          | <0.001  | 1.99 (1.92-2.06)          | <0.001  |

**eTable 5.** Severe maternal morbidity and severe neonatal morbidity, modelled as count rather than binary variables.

| Outcome                   | Unadjusted         |         | Age-Adjusted     |         | Fully-Adjusted*  |         |
|---------------------------|--------------------|---------|------------------|---------|------------------|---------|
|                           | RR (95% CI)        | p-value | RR (95% CI)      | p-value | RR (95% CI)      | p-value |
| Severe maternal morbidity | 1.16 (0.98-1.38)   | 0.08    | 1.22 (1.03-1.46) | 0.025   | 1.15 (0.97-1.37) | 0.11    |
| Severe neonatal morbidity | 0.89 (0.79-0.1.01) | 0.06    | 0.88 (0.78-0.99) | 0.036   | 0.87 (0.77-0.98) | 0.024   |

\*Adjusted for maternal age, calendar year, immigration status, overall comorbidity burden, parity and history of preterm birth, multiple gestation, and mode of delivery

Abbreviations: CI (confidence interval), RR (rate ratio)

**eTable 6.** Most frequent diagnostic and procedural indicators for primary outcomes among physicians and nonphysicians experiencing severe maternal morbidity and severe neonatal morbidity, respectively

| Severe Maternal Morbidity                                    |                             |      |                       |      | Severe Neonatal Morbidity                                              |                              |      |                       |      |
|--------------------------------------------------------------|-----------------------------|------|-----------------------|------|------------------------------------------------------------------------|------------------------------|------|-----------------------|------|
| Component                                                    | Non-Physicians<br>(n=5,137) |      | Physicians<br>(n=216) |      | Component                                                              | Non-Physicians<br>(n=18,406) |      | Physicians<br>(n=554) |      |
|                                                              | N                           | %    | N                     | %    |                                                                        | N                            | %    | N                     | %    |
| Postpartum hemorrhage with RBC transfusion                   | 1,410                       | 27.4 | 67                    | 31.0 | Ventilatory support                                                    | 12,600                       | 68.5 | 415                   | 74.9 |
| Maternal ICU admission                                       | 848                         | 16.5 | 21                    | 9.7  | Intravenous fluids                                                     | 6,064                        | 32.9 | 197                   | 35.6 |
| Puerperal sepsis                                             | 853                         | 16.6 | 52                    | 24.1 | Respiratory distress syndrome                                          | 4,293                        | 23.3 | 134                   | 24.2 |
| Severe pre-eclampsia & HELLP syndrome                        | 660                         | 12.8 | 21                    | 9.7  | Gestational age <32 weeks                                              | 3,278                        | 17.8 | 101                   | 18.2 |
| Peripartum hysterectomy                                      | 523                         | 10.2 | 25                    | 11.6 | Birthweight <1500 grams                                                | 2,893                        | 15.7 | 80                    | 14.4 |
| Curettage with RBC transfusion                               | 403                         | 7.8  | 20                    | 9.3  | Sepsis/ septicaemia                                                    | 2,806                        | 15.2 | 66                    | 11.9 |
| Cardiac conditions                                           | 310                         | 6.0  | 8                     | 3.7  | Other respiratory conditions: Primary atelectasis, respiratory failure | 2,244                        | 12.2 | 59                    | 10.6 |
| Eclampsia                                                    | 243                         | 4.7  | <6                    | <2.8 | Central venous or arterial catheter                                    | 1,155                        | 6.3  | 42                    | 7.6  |
| Complications of obstetric surgery and procedures            | 247                         | 4.8  | 9                     | 4.2  | Body cavity surgical procedure                                         | 811                          | 4.4  | 20                    | 3.6  |
| Procedures to the uterus/pelvic vessels with RBC transfusion | 248                         | 4.8  | 12                    | 5.6  | Neonatal death                                                         | 704                          | 3.8  | 21                    | 3.8  |

**eTable 7.** Baseline characteristics of pregnancies in physicians by specialty.

| <b>Characteristics</b>                            | <b>Family medicine<br/>(N=5,315)</b> | <b>Surgical<br/>(N=544)</b> | <b>Other<br/>(N=4,163)</b> |
|---------------------------------------------------|--------------------------------------|-----------------------------|----------------------------|
| <b>Age (years)</b>                                |                                      |                             |                            |
| Median (IQR)                                      | 33 (31-36)                           | 35 (32-37)                  | 34 (32-36)                 |
| <b>Year of birth, N (%)</b>                       |                                      |                             |                            |
| 2002-2009                                         | 1,913 (36.0%)                        | 197 (36.2%)                 | 1,495 (35.9%)              |
| 2010-2018                                         | 3,402 (64.0%)                        | 347 (63.8%)                 | 2,668 (64.1%)              |
| <b>Immigration status, N (%)</b>                  |                                      |                             |                            |
| Canadian-born                                     | 4,411 (83.0%)                        | 469 (86.2%)                 | 3,410 (81.9%)              |
| Immigrant                                         | 904 (17.0%)                          | 75 (13.8%)                  | 753 (18.1%)                |
| <b>Comorbidities (ADGs), N (%)</b>                |                                      |                             |                            |
| 0-5                                               | 3,049 (57.3%)                        | 349 (64.2%)                 | 2,469 (59.3%)              |
| 6-9                                               | 1,917 (36.1%)                        | 168 (30.9%)                 | 1,454 (34.9%)              |
| 10+                                               | 349 (6.6%)                           | 27 (5.0%)                   | 240 (5.8%)                 |
| <b>Pre-existing hypertension, N (%)</b>           |                                      |                             |                            |
| Yes                                               | 87 (1.6%)                            | 10 (1.8%)                   | 95 (2.3%)                  |
| <b>Pre-existing diabetes, N (%)</b>               |                                      |                             |                            |
| Yes                                               | 42 (0.8%)                            | 2 (0.4%)                    | 36 (0.9%)                  |
| <b>Parity and history of preterm birth, N (%)</b> |                                      |                             |                            |
| No prior births                                   | 2,498 (47.0%)                        | 268 (49.3%)                 | 2,039 (49.0%)              |
| 1 prior term birth                                | 1,858 (35.0%)                        | 180 (33.1%)                 | 1,450 (34.8%)              |
| 1 prior preterm birth                             | 107 (2.0%)                           | 10 (1.8%)                   | 102 (2.5%)                 |
| 2+ prior births, all term                         | 779 (14.7%)                          | 75 (13.8%)                  | 518 (12.4%)                |
| 2+ prior births, 1+ preterm                       | 73 (1.4%)                            | 11 (2.0%)                   | 54 (1.3%)                  |
| <b>Multiple status, N (%)</b>                     |                                      |                             |                            |
| Singleton                                         | 5,033 (94.7%)                        | 506 (93.0%)                 | 3,910 (93.9%)              |
| Twins or higher order                             | 282 (5.3%)                           | 38 (7.0%)                   | 253 (6.1%)                 |
| <b>Mode of delivery, N (%)</b>                    |                                      |                             |                            |

|                     |               |             |               |
|---------------------|---------------|-------------|---------------|
| Spontaneous vaginal | 3,131 (58.9%) | 316 (58.1%) | 2,369 (56.9%) |
| Operative vaginal   | 644 (12.1%)   | 44 (8.1%)   | 493 (11.8%)   |
| Caesarean section   | 1,540 (29.0%) | 184 (33.8%) | 1,301 (31.3%) |
